# Supplementary material
Source: PubMed Central journal article supplement (PMC7328129)

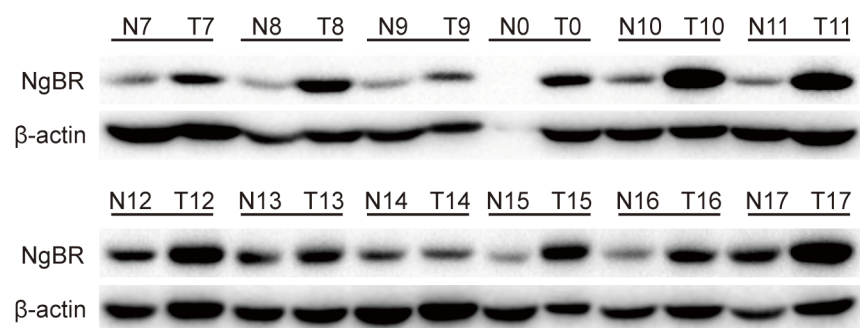

Supplement: NIHMS1594516-supplement-Supplementary_files.pdf [file NIHMS1594516-supplement-Supplementary_files.pdf]
